# AN INTEGRATIVE APPROACH DISCOVERS A NOVEL ANTI-LEUKEMIC PEPTIDE FROM HUMAN MILK

## Authors

Wararat Chiangjong,<sup>1</sup> Jirawan Panachan,<sup>2</sup> Thitinee Vanichapol,<sup>2</sup> Nutkridta Pongsakul,<sup>1</sup> Tassanee Lerksuthirat,<sup>3</sup> Pracha Nuntnarumit,<sup>4</sup> Sarayut Supapannachart,<sup>4</sup> Chantragan Srisomsap,<sup>5</sup> Jisnuson Svasti,<sup>5,6</sup> Suradej Hongeng,<sup>2</sup> Somchai Chutipongtanate<sup>1,7,8,\*</sup>

## Affiliations

<sup>1</sup> Pediatric Translational Research Unit, Department of Pediatrics, Faculty of Medicine Ramathibodi Hospital, Mahidol University, Bangkok 10400 Thailand.

[wararat\\_01@yahoo.com](mailto:wararat_01@yahoo.com) (W.C.); [nutkridta@yahoo.co.th](mailto:nutkridta@yahoo.co.th) (N.P.)

<sup>2</sup> Division of Hematology and Oncology, Department of Pediatrics, Faculty of Medicine Ramathibodi Hospital, Mahidol University, Bangkok 10400 Thailand.

[jirawan.pan.13@gmail.com](mailto:jirawan.pan.13@gmail.com) (J.P.); [thitinee@gmail.com](mailto:thitinee@gmail.com) (T.V.); [suradej.hon@mahidol.ac.th](mailto:suradej.hon@mahidol.ac.th) (S.H.)

<sup>3</sup> Research Center, Faculty of Medicine Ramathibodi Hospital, Mahidol University, Bangkok 10400 Thailand. [tassanee.lerk@gmail.com](mailto:tassanee.lerk@gmail.com) (T.L.)

<sup>4</sup> Division of Neonatology, Faculty of Medicine Ramathibodi Hospital, Mahidol University, Bangkok 10400 Thailand. [pracha.nun@mahidol.ac.th](mailto:pracha.nun@mahidol.ac.th) (P.N.);

[sarayut.sup@mahidol.ac.th](mailto:sarayut.sup@mahidol.ac.th) (S.S.)

<sup>5</sup> Laboratory of Biochemistry, Chulabhorn Research Institute, Bangkok 10210 Thailand. [chantragan@cri.or.th](mailto:chantragan@cri.or.th) (C.S.); [jisnuson@cri.or.th](mailto:jisnuson@cri.or.th) (J.S.)

<sup>6</sup> Applied Biological Sciences Program, Chulabhorn Graduate Institute, Bangkok 10210 Thailand

<sup>7</sup> Department of Clinical Epidemiology and Biostatistics, Faculty of Medicine Ramathibodi Hospital, Mahidol University, Bangkok 10400 Thailand.

<sup>8</sup> Chakri Naruebodindra Medical Institute, Faculty of Medicine Ramathibodi Hospital, Mahidol University, Samut Prakan 10540 Thailand

\*Corresponding author: [schuti.rama@gmail.com](mailto:schuti.rama@gmail.com), [somchai.chu@mahidol.edu](mailto:somchai.chu@mahidol.edu)

## Correspondence:

Somchai Chutipongtanate, Ph.D., M.D.

Pediatric Translational Research Unit, Department of Pediatrics, Faculty of Medicine Ramathibodi Hospital, Mahidol University

270 Rama 6 Rd. Phayathai

Ratchathewi Bangkok 10400 Thailand

+66-82-3346020

[schuti.rama@gmail.com](mailto:schuti.rama@gmail.com), [somchai.chu@mahidol.edu](mailto:somchai.chu@mahidol.edu)

## Abstract

Chemotherapy in childhood leukemia is associated with late morbidity in leukemic survivors, while certain patient subsets relatively resistant to standard chemotherapy. Identifying new agents with the sensitivity and selectivity toward leukemic cells with less systemic toxicity is a warrant. Peptide-based therapeutics is gaining attention during the last few years. Here, we used an integrative workflow combining mass spectrometric peptide library construction, *in silico* anticancer peptide screening, and *in vitro* leukemic cell studies to discover a novel anti-leukemic peptide owning 3+charges and alpha-helical structure, namely HMP-S7, from human breast milk. HMP-S7 showed cytotoxic activity against four distinct leukemic cell lines in a dose-dependent manner but had no affected on solid malignancies or representative normal cells. HMP-S7 induced leukemic cell death by

51 penetrating the plasma membrane into the cytoplasm, causing lactate dehydrogenase  
52 leakage, thereby defining membranolytic action. In conclusion, HMP-S7 is the selective  
53 anti-leukemic peptide promising for further validation in preclinical and clinical studies.

54  
55 **Keywords:** Anticancer peptide; Cancer cytotoxicity; Human breast milk; Leukemia; Peptidomics;  
56 Virtual screening

## 57 58 **MAIN TEXT**

### 59 60 **Introduction**

61 Cancer is a significant cause of death in children and adolescence during the last few  
62 years in Asia, Central and South America, Northwest Africa, and the Middle East (1).  
63 Hematologic malignancies, particularly acute lymphocytic leukemia (ALL), are  
64 predominant, accounting for 30% of childhood cancer (2). Optimization of  
65 chemotherapeutic regimens during the past decades has resulted in more than 90%  
66 remission rate in childhood ALL (3). However, the burden of late morbidity due to  
67 chemotherapeutic treatments, which occur in two-thirds of pediatric cases (4), has become  
68 important considerations as the number of long-term leukemic survivors increases (5).  
69 Moreover, specific subsets of pediatric ALL are relatively resistant to standard  
70 chemotherapy and have a high risk of relapse (6). These challenges pose the need to further  
71 improve current treatment while identifying new agents should also be concerned with the  
72 sensitivity and selectivity toward leukemic cells with less-to-no toxicity to normal cells.

73 Peptide-based drugs, or anticancer peptides, can be a new strategy for cancer  
74 treatment. Although the exact mechanism and selectivity criteria have yet to be elucidated,  
75 anticancer peptides may have oncolytic effects depending on peptide characteristics and  
76 target membrane features in selectivity and toxicity (7). Cancer cells have high negative  
77 transmembrane potential, greater membrane fluidity, more abundant microvilli (increasing  
78 outer surface area), the net negative charge from anionic molecules on the surface. In  
79 contrast, normal cells are electrically neutral (8-11). These negative charges on the cancer  
80 cell membrane are attractive to the positive charge peptides to disturb membrane stability,  
81 causing the loss of electrolyte and cell death (8), while high cholesterol contents of the  
82 normal cell membrane can protect cell fluidity and block cationic peptide entry (12).  
83 Common strategies for anticancer peptide discovery are; i) activity-guided purification from  
84 biological/natural products (13); ii) examination of antimicrobial peptides for cancer  
85 sensitivities (14, 15). The former approach tends to deliver positive results, but it is  
86 associated with labor-intensive and time-consuming processes. The latter strategy is  
87 relatively cost- and time-effective but still limited to antimicrobial peptides known a priori.  
88 Investigation of anticancer peptides has progressed slowly in the past decades, indicating  
89 gaps for improvement, particularly on the selection of peptide sources, screening methods,  
90 and downstream analyses.

91 Human milk is a promising source of therapeutic peptides. Bioactive milk peptides  
92 are released from sourced proteins by enzymatic hydrolysis, fermentation with a proteolytic  
93 starter culture, and proteolysis with proteolytic microorganisms (16, 17). Although human  
94 milk has rarely been investigated for anticancer activities, studies have showed human milk-  
95 derived peptides could exhibit various biological effects such as antimicrobial (18, 19) and  
96 immunomodulatory activities (20). Human milk-derived beta-casein fragments have been  
97 studied for immunomodulation, antibacterial, antioxidant, opioid agonist, antihypertensive  
98 activities, and cell proliferation of human preadipocytes (21). These bioactive peptides have  
99 differed in amino acid compositions and sequences, and the peptide length can vary from  
00 two to twenty amino acid residues (22). It is anticipated that human milk also contains

01 anticancer peptides as that of bovine milk. PGPIP hexapeptide of bovine  $\beta$ -casein can  
02 inhibit invasion and migration of human ovarian cancer cells (23). ACFP, an anti-  
03 cancer fusion peptide derived from bovine  $\beta$ -casein and lactoferrin, can inhibit viability and  
04 promote apoptosis in primary ovarian cancer cells (24). Interestingly, breastfeeding for six  
05 months or longer was associated with a 19% lower risk of all childhood leukemia than  
06 shorter breastfeeding or none (25, 26). Identifying novel anti-leukemic peptides from human  
07 milk is a warrant for the future development of non-allergic and non-toxic peptide-based  
08 drugs to improve childhood leukemia therapy.

09 This study aimed to discover a novel anti-leukemic peptide with less cytotoxicity  
10 toward normal cells from human milk. We applied a robust workflow integrating the  
11 strength of liquid chromatography-tandem mass spectrometry to generate a natural-  
12 occurring human milk peptide library *in silico* screening based on physicochemical,  
13 structural, and predictive anticancer properties by machine learning algorithms to prioritize  
14 candidates for functional studies of synthetic peptides to determine anti-leukemic activity  
15 and the mode of action. By this strategy, a novel anti-leukemic peptide was identified from  
16 human milk as the main outcome.

## 17 Results

18  
19 To separate human milk peptides and test their cytotoxicity to leukemic cells, ten  
20 healthy mothers aged between 25 and 36 years old ( $32.3 \pm 3.27$  years old) donated breast milk  
21 at once during 6-129 days ( $63.8 \pm 38.97$  days) after delivery (details in **Table S1**). After  
22 multiple steps of centrifugation to remove cells, lipids, and extracellular vesicles, and then  
23 ultrafiltration (3-kDa cutoff) to remove proteins, the small molecules (<3-kDa), except the  
24 peptides, passed through the C18 SPE. Moreover, the C18 bound peptides were eluted by  
25 various acetonitrile concentrations and then performed their cytotoxicity. The conceptual  
26 framework of this study is illustrated in **Figure 1**.  
27

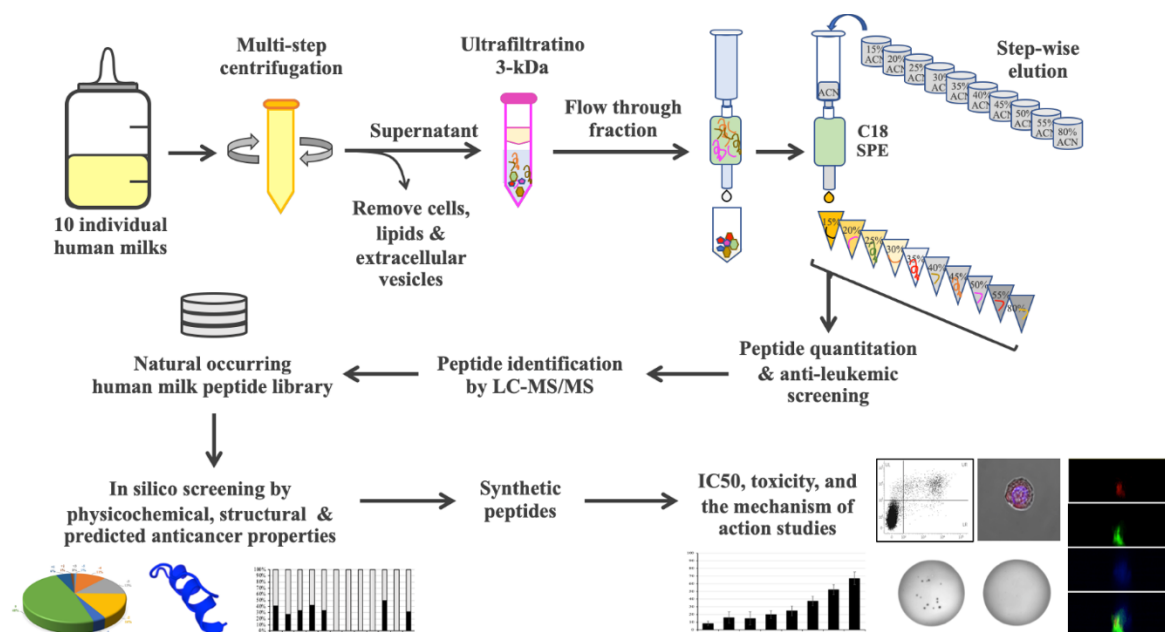

28  
29  
30 **Figure 1. A conceptual framework of the integrative strategy for discovering a novel**  
31 **human milk-derived anti-leukemic peptide.** This strategy combines the strengths of mass  
32 spectrometry for high-throughput peptide identification, *in silico* screening for prioritizing  
33 peptide candidates, and experimental validation for anti-leukemic activities. Abbreviations:

LC-MS/MS, liquid chromatography-tandem mass spectrometry; IC<sub>50</sub>, half-maximal inhibitory concentration; SPE, solid-phase extraction.

*Most human milk peptide fractions had cytotoxic effects on leukemic and normal cell lines*

After C18 bound peptide elution, the crude milk peptide fraction was tested to observe cytotoxic effects against Jurkat (T lymphoblastic leukemia) and FHs74Int cells (the representative normal intestinal epithelium), respectively (**Figure 2A**). The crude milk peptides showed a potent cytotoxic effect on Jurkat but had less impact on FHs74Int cells. The coarse milk peptide fraction was then fractionated by C18 SPE with the step-wise ACN elution, in which the chromatogram was demonstrated by the peptide amounts (**Figure 2B**). These eluted peptides by 15%-80% ACN were treated to Jurkat leukemic cells and FHs74Int normal cells to observe cell survival as shown in **Figure 2C**. The low peptide amount in 15%-30% ACN eluted peptide fractions could decrease Jurkat cell survival more than the highest peptide amount (45% ACN eluted peptide fraction). This indicated that the elimination of Jurkat leukemic cells depended on the specific peptide sequence with hydrophilic property more than peptide amount.

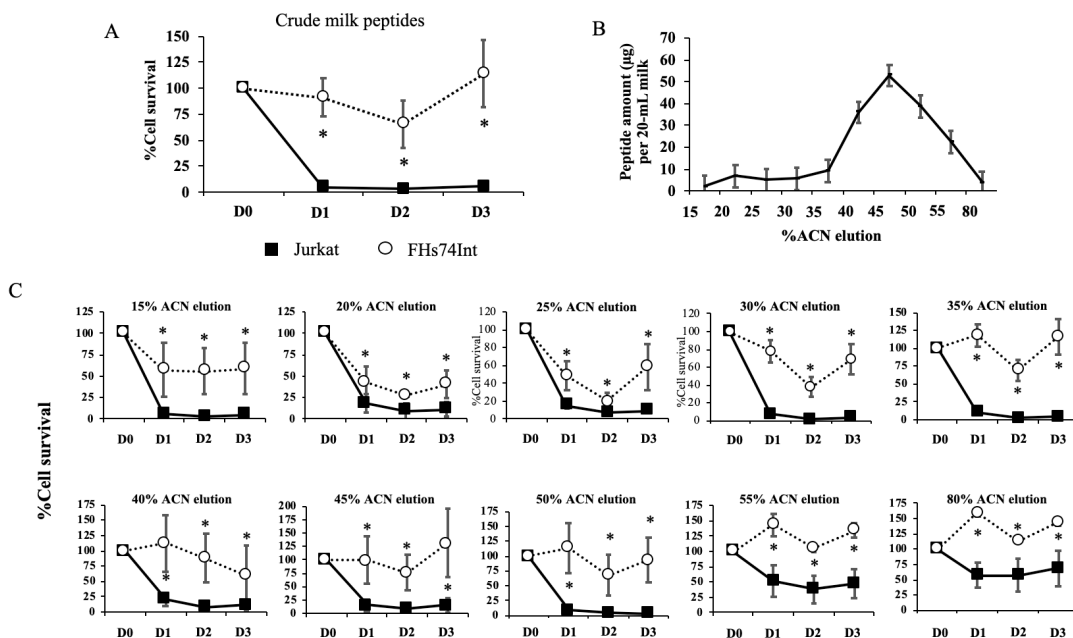

**Figure 2. Human milk peptide fractionation and cytotoxicity profiles against leukemic and normal cells.** (A) After centrifugation and passing through <3 kDa cut-off column, the milk solution (20 mL) was passed through the C18 column. The milk peptides were bound to the C18 SPE column, eluted with 80% ACN (1 mL), and dried using a SpeedVac concentrator. The crude milk peptides were resuspended in the culture medium and then treated to Jurkat and FHs74Int cells for 1-3 days (n=3 biological replication). The graph shows % cell survival (mean±SEM). Peptides were then fractionated into 10 fractions by C18 SPE column with the step-wise acetonitrile elution. An equal volume (20 ml) of the individual human milk supernatant (<3 kDa) was flown through the C18 SPE column. The human milk peptides in the supernatant were bound to the column and eluted by equal volume (1 mL) of 15%, 20%, 25%, 30%, 35%, 40%, 45%, 50%, 55%, and 80% ACN in subsequently. These peptides were subjected to LC-MS/MS to generate the peptide library. (B) The fractionated peptides were resuspended in deionized distilled water and then quantitated using Bradford's assay. The peptide amount in each fraction was calculated as

66 mean  $\pm$  SEM. (C) Also, Jurkat and FHs74Int cells were treated with the 10 eluted fractions  
67 of human milk peptides of 3 individual volunteer mothers for 1-3 days. The remaining live  
68 cells after the 10 peptide fraction treatment were detected by WST-1 solution at 440 nm.  
69 The OD was subtracted by culture medium without cells (blank). The percentage of cell  
70 survival was calculated by (OD of the sample)/(OD of non-treatment) $\times$ 100. \*;  $p < 0.05$   
71 comparing to non-treatment condition (n=3 individual milk specimens with 3 technical  
72 replicates for each specimen).

### 73 *Peptide identification, library construction, and in silico anti-cancer peptide screening*

74 Eleven fractions (from one crude and ten step-wised ACN eluates) of human milk  
75 peptides were identified by LC-MS/MS. A total of 142 naturally occurring human milk  
76 peptides with unique sequences were collected into the peptide library, ready for further  
77 analyses (**Table S2**). The distribution of all identified peptides by fractions, peptide length,  
78  $pI$ , and the net charge was shown in **Figure 3A** (upper panel). Overall, most identified natural  
79 occurring-milk peptides had less than 20 amino acids in length, contained zero and anionic  
80 net charge with inclining acid property. The most frequently detected pattern was the natural  
81 peptides with proline-rich sequence (**Figure S1**). This proline-rich peptide is probably crucial  
82 to some biological effects of human milk. For example, a ligand containing a proline-rich  
83 sequence or a single proline residue is involved in protein-protein interaction (27). Proline-  
84 rich sequence-contained antimicrobial peptides can kill microorganisms by interacting with  
85 70S ribosome and disrupting protein synthesis (28).

86 *In silico* screening of the natural-occurring human milk peptide library was performed  
87 by a robust workflow. Firstly, we screened the library by physicochemical properties, i.e.,  
88 length,  $pI$ , and net charge (as shown in **Figure 3A**) since most of the known anticancer  
89 peptides are small cationic peptides (commonly 5-30 amino acid length with net charge +2 to  
90 +9) that bind to the negative charge of phosphatidylserine and sialic acid on the cancer cell  
91 membrane (12, 29, 30). Secondly, the secondary structure of the peptides were predicted by  
92 the PEP-FOLD3 webserver (**Figure 3B**). Peptides can form alpha-helix, beta-sheet, and  
93 random coils (31). However, most of the known anticancer peptides shared the alpha-helix  
94 structure (32). Thirdly, the identified peptides were predicted for anticancer properties using  
95 machine learning prediction software. Since ACP prediction software could provide different  
96 results depending on the algorithms and training datasets, four online-accessible software  
97 were then applied in this study, including ACPpred-FL (33), antiCP 2.0 (34), MLACP (35),  
98 and mACPpred (36) (**Figure 3C**). As a result, eight human milk peptides and one bovine milk  
99 peptide (as a positive ACP control) from various prioritization based on net charges,  
00 secondary structures, and the predicted anticancer properties were selected for further  
01 analysis (**Table S3**).  
02  
03

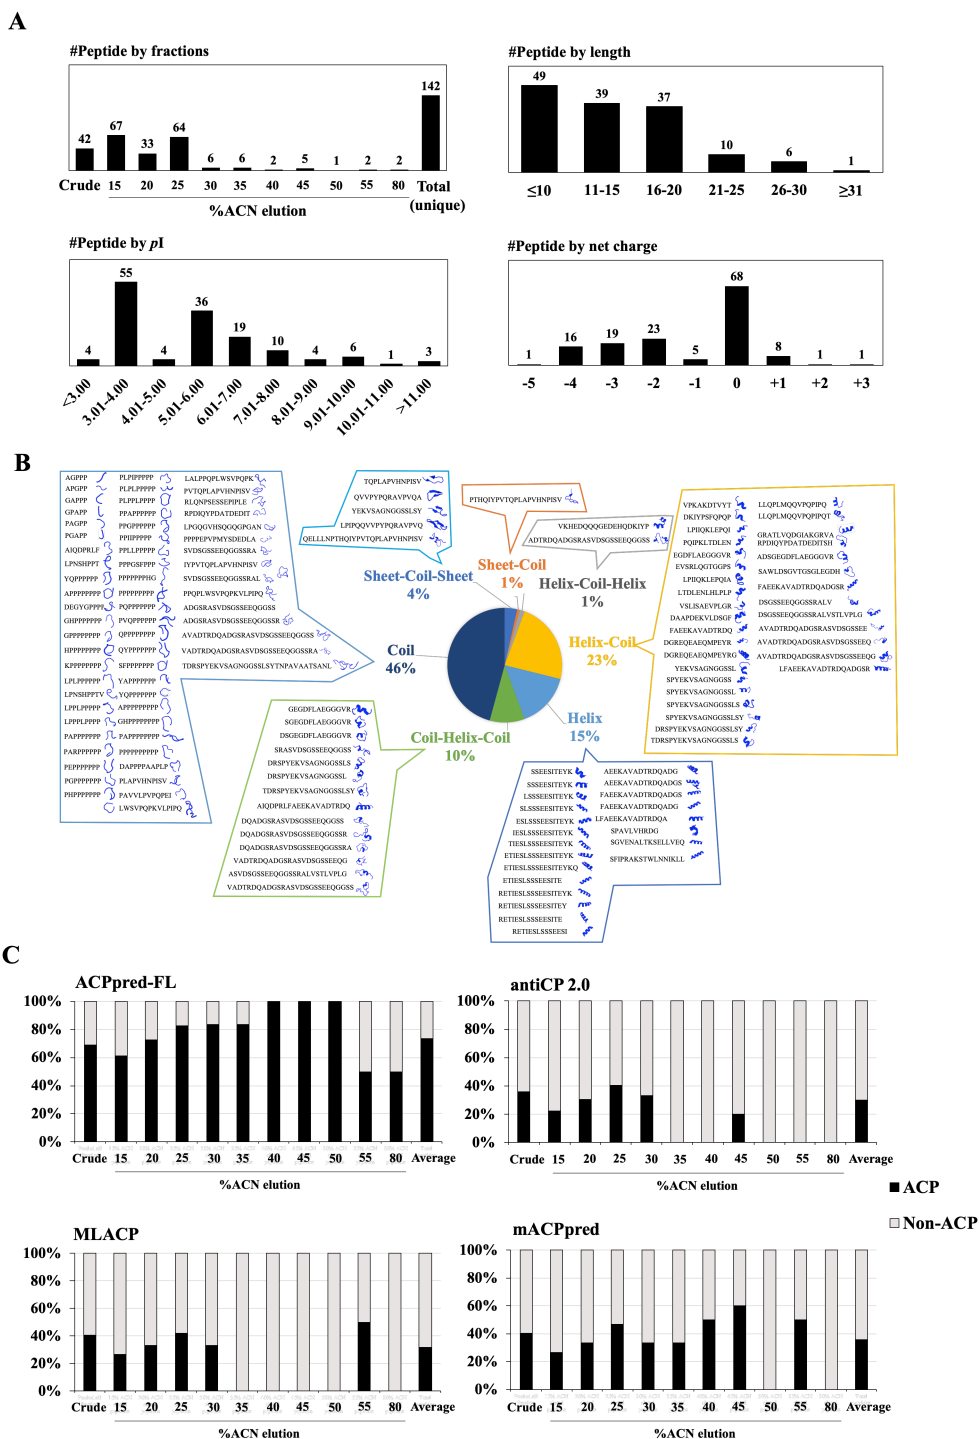

**Figure 3. Predicted physicochemical, structural, and machine learning-based anticancer peptide screening of natural occurring-human milk peptides.** (A) Distribution of the unique human milk peptides identified by LC-MS/MS. (B) the distribution and the secondary structure of all identified peptides predicted by PEP-FOLD3 software. (C) Proportions of the predicted ACP vs. non-ACP peptides by four ACP machine learning programs, including ACPpred-FL, antiCP 2.0, MLACP, and mACPPred. The percentage of ACP (black) and non-ACP (gray) was calculated by (number of ACP or non-ACP prediction/number of total identified peptides in individual fraction) × 100%. Full results of *in silico* ACP screening was provided in **Table S2**.

16  
17  
18  
19  
20  
21  
22  
23  
24  
25  
26  
27  
28  
29  
30  
31  
32  
33  
34  
35  
36  
37  
38  
39

*HMP-S7 killed leukemic cells but not normal cells or solid tumor cell lines*

**Figure 4A** illustrated eight selected human milk-derived peptides and a known bovine milk-derived anticancer peptide synthesized for cancer cytotoxicity screening using trypan blue staining. These results showed that HMP-S7, the highest cationic charged peptide (+3 net charge) with  $\alpha$ -helical structure, had higher inhibitory activity than the other human milk-derived peptides against four leukemic cell lines, including Jurkat, Raji, RS4;11, and Sup-B15 cells (**Figure 4B**). To elucidate the selectivity of HMP-S7, the effect of HMP-S7 was further observed on normal cells, i.e., T cells and HEK293T embryonic kidney cells, and solid tumor cell lines, i.e., SH-SY5Y neuroblastoma, HepG2 hepatoblastoma, A549 lung adenocarcinoma, MDA-MB-231 breast cancer, and HT-29 colorectal adenocarcinoma by trypan blue staining (**Figure 4C**). Compared to BMP-S6, the known anti-cancer peptide, HMP-S7 had less cytotoxicity toward the normal cells and most cancer cells. This result suggested that HMP-S7 was more selective to leukemic cells than the BMP-S6. Although HMP-S7 had no cytotoxicity on normal T cells, it showed a mild cytotoxic effect on HEK293T cells. Based on these activity profiles, HMP-S7 was chosen to further examine the IC<sub>50</sub> against four leukemic cell lines (**Figure 5A**). The results demonstrated anti-leukemic activity of HMP-S7 was dose-dependent, with the IC<sub>50</sub> ranged from 89.2 to 186.3  $\mu$ M depending on leukemic cells to be tested. Furthermore, the inhibitory activity of the HMP-S7 treated Jurkat leukemic cell lines was confirmed by the colony-forming assay using soft agar, as shown in **Figure 5B**. Because HMP-S7 could induce leukemic cell death; thereafter, its cell death mechanism should be further investigated.

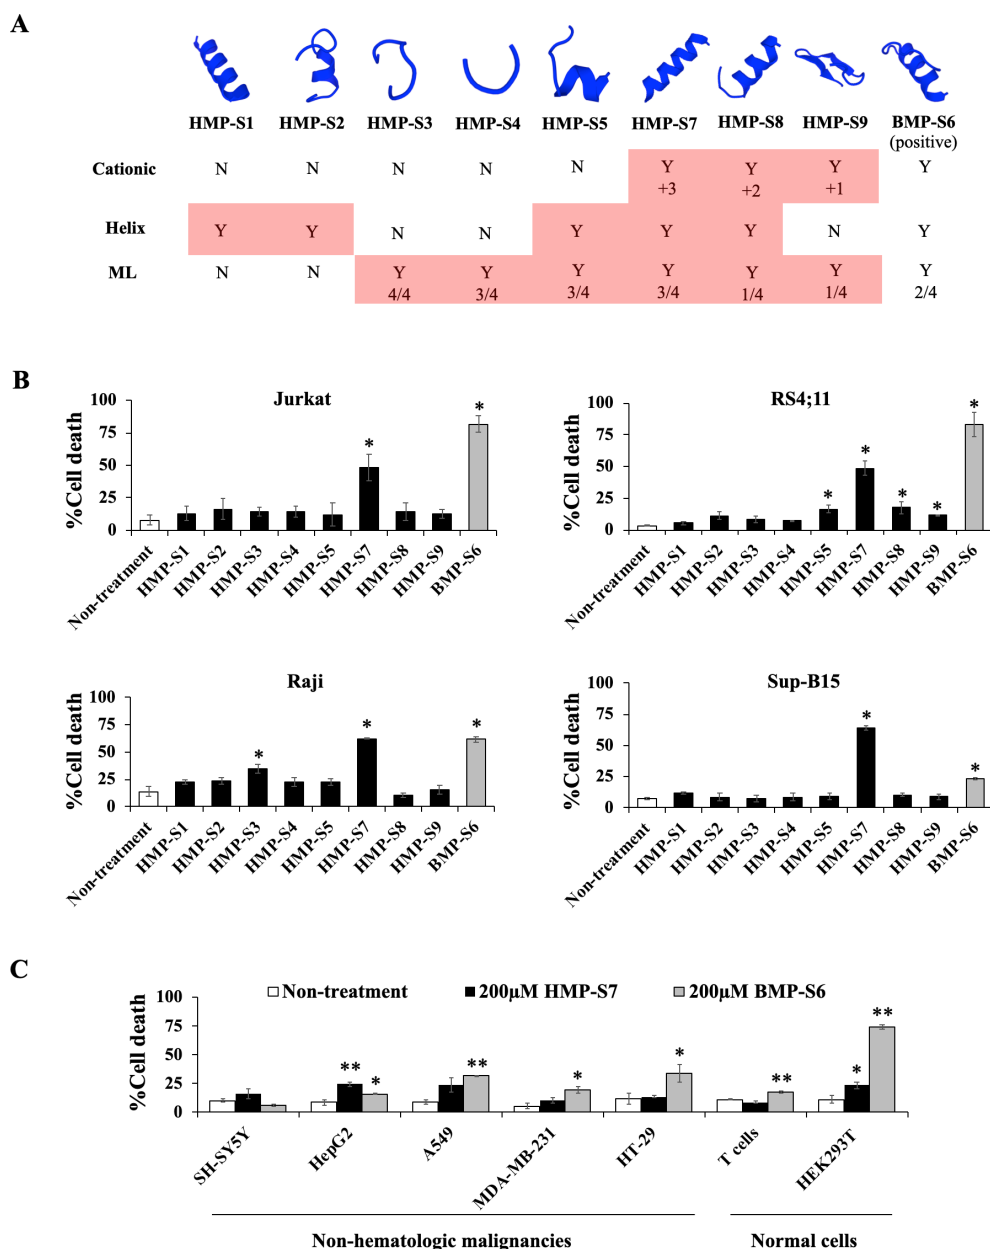

**Figure 4. Effect of the 8 synthetic human milk peptides on leukemic and non-leukemic cell lines.** (A) After the combination of physicochemical properties with cationic peptides, helical structure, and machine learning prediction, the 8 synthetic human milk peptides (HMPs) and the positive control (BMP-S6) (the details of the selected peptides were summarized in **Table S3**) were examined for anti-leukemic activity. (B) Four leukemic cell lines, including Jurkat, Raji, RS4;11 and Sup-B15, were treated with 8 synthetic HMPs and BMP-S6 at 200  $\mu$ M to observe %cell death after 24 h treatment using trypan blue exclusion assay under light microscope. The % cell death was calculated by (number of death cells/total cell number)  $\times$  100. The percentage of cell death of all 4 leukemic cell lines after HMP-S7 treatment can significantly increase. (C) Besides leukemic cell treatment, HMP-S7 was treated to non-hematological malignancy cell lines, including neuroblastoma (SH-SY5Y), hepatoblastoma (HepG2), lung cancer (A549), triple-negative breast cancer (MDA-MB-231), colon cancer (HT-29), and normal cells including T cells and HEK293T embryonic kidney cells. Statistical significance was calculated by %cell death of three biological replicates. \* $p$ <0.05, \*\*  $p$ <0.01 compared to non-treatment condition.

40  
41  
42  
43  
44  
45  
46  
47  
48  
49  
50  
51  
52  
53  
54  
55  
56



57

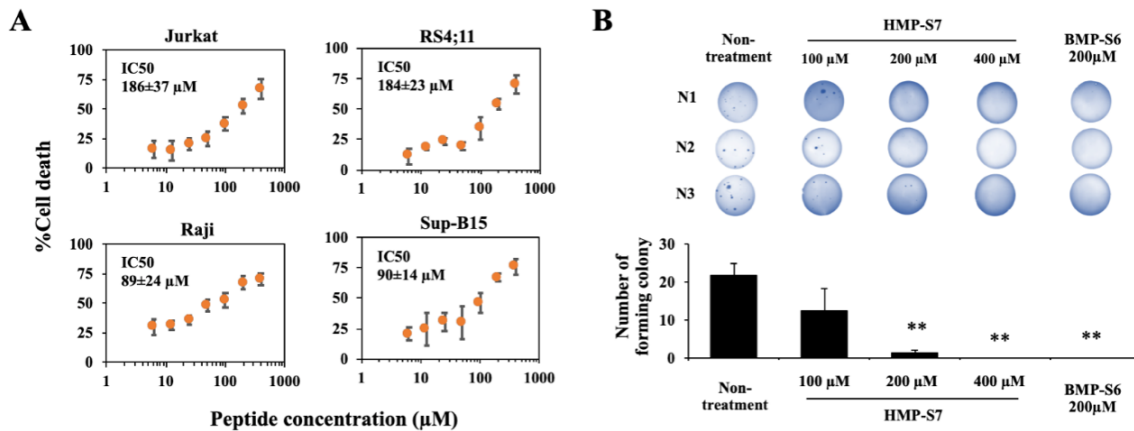

58  
59  
60  
61  
62  
63  
64  
65  
66  
67  
68  
69  
**Figure 5. The inhibitory concentration of HMP-S7 treated leukemic cells.** (A) Four leukemic cell lines i.e., Jurkat, Raji, RS4;11, and Sup-B15 cells, were treated with HMP-S7 in various concentrations (0-400  $\mu$ M) for 24 h and their %cell death (mean  $\pm$  SD) was counted by using trypan blue exclusion assay. (B) The number of the forming colony of HMP-S7 (100  $\mu$ M, 200  $\mu$ M, and 400  $\mu$ M) treated Jurkat cells was confirmed the anti-leukemic activity of HMP-S7. The positive control peptide was BMP-S6 at 200  $\mu$ M concentration. After 24 h treatment, the cell suspension was equally volume taken into soft agar to form colonies for 20 days. The colonies in the soft agar were stained with crystal violet and counted. \*\*,  $p < 0.01$  compared to non-treatment condition (n=3 biological replicates).

#### 70 *Mechanisms of HMP-S7-induced leukemic cell death*

71 To elucidate whether HMP-S7 can act as the membranolytic peptide against  
72 leukemic cells, Jurkat cells were treated with HMP-S7 (untagged or FITC-tagged) at the IC50  
73 for 24 h. By confocal microscopy, PI staining of cytoplasmic RNA was observed in the  
74 untagged HMP-7 and the positive control Triton X-100 (**Figure 6A**). The FITC-tagged HMP-  
75 S7 was located in the cytoplasm as PI stain of cytoplasmic RNA. Flow cytometry showed  
76 that the HMP-S7 could be more cumulative into cytoplasm when increasing the  
77 concentrations from IC50 to 2 $\times$ IC50 (**Figure 6B** and **6C**). By lactate dehydrogenase (LDH)  
78 release assay, intracellular LDH leakage into the cell culture supernatant was evidence at 24  
79 h in HMP-S7-treated RS4;11 cells (at IC50 and 2 $\times$ IC50) and Triton X-100 treated cells  
80 (**Figure 6D**). Finally, HMP-S7-induced leukemic cell death was confirmed by flow cytometry  
81 using Annexin V/PI co-staining. The number of apoptotic cells was significantly increased  
82 compared to non-treatment condition, while a dose-response relationship was observed in  
83 four leukemic cell lines with IC50 and 2 $\times$ IC50 of HMP-S7 treatment (**Figure 6E** and **6F**).  
84 Taken together, our findings suggested that HMP-S7 attacked leukemic cells to form  
85 micropores on cellular membranes and penetrated into the cytoplasm to perturb leukemic  
86 cells until the death.

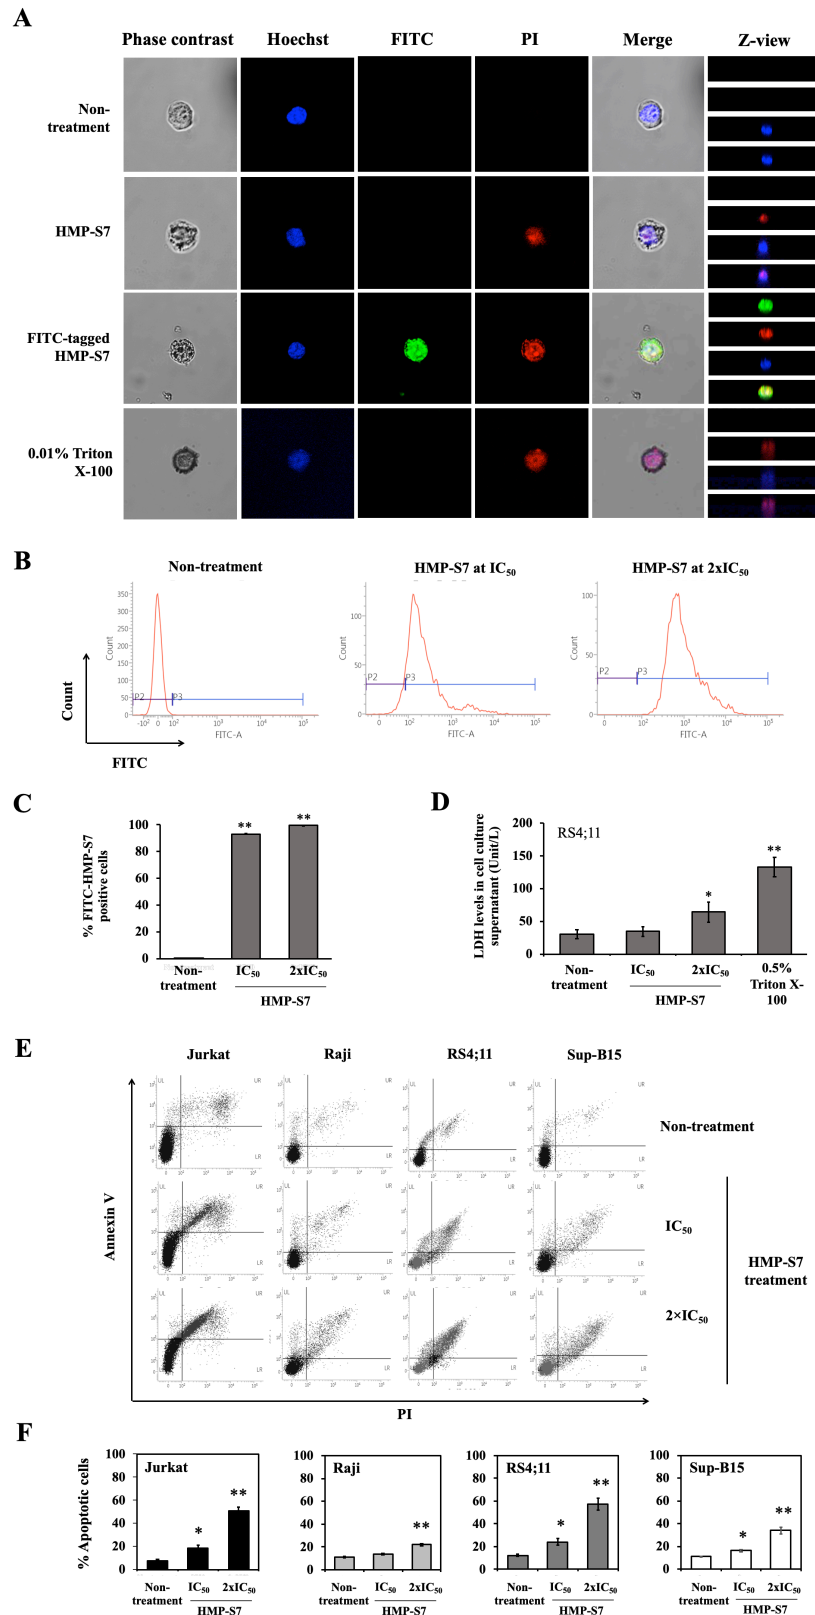

**Figure 6. HMP-S7 action on internalization and leukemic cell death.** Jurkat cells were treated with HMP-S7 conjugated with or without FITC at IC<sub>50</sub> and 0.01% Triton X-100 (positive control) and stained with PI to observe membrane permeability (A). The FITC tagged HMP-S7 (at IC<sub>50</sub> and 2×IC<sub>50</sub>) were internalized into the cytoplasm of Jurkat cells. (B) Flow cytometry of FITC tagged HMP-S7-treated Jurkat cells. (C) The bar graph showed

87

88

89

90

91

92

93

94 flow cytometric results as %FITC-positive Jurkat cells. (D) LDH release assay. LDH level  
95 was detected as the evidence of cellular membrane disruption in the culture supernatant of  
96 HMP-S7-treated RS4;11 cells at IC<sub>50</sub> and 2×IC<sub>50</sub> for 24 h. Triton X-100 treated cells were  
97 the positive control. (E) Flow cytometric cell death assay using Annexin-V/PI co-staining.  
98 Four leukemic cells, i.e., Jurkat, Raji, RS4;11, and Sup-B15 cell lines were treated with  
99 HMP-S7 at IC<sub>50</sub> and 2×IC<sub>50</sub> for 24 h. (F) Bar graphs showed %apoptotic cell death  
00 composed of early apoptosis (upper left quadrant), late apoptosis (upper right quadrant), and  
01 necrosis (lower right quadrant). \**p*<0.05 and \*\**p*<0.01 compared to non-treatment  
02 condition. All experiments were performed in three biological replicates. \**p*<0.05,  
03 \*\**p*<0.01 compared to non-treatment condition.

## 04 05 Discussion

06 This study aimed to explore the novel ACP from naturally occurred-human milk  
07 peptides. Several reasons supported human milk as a good source for this exploration. First,  
08 there is evidence that human breast milk can significantly reduce leukemia in children with  
09 more 6-month breastfeeding (25, 26). Second, HAMLET (human alpha-lactalbumin made  
10 lethal to tumor cells), a protein-lipid complex that induces apoptosis-like death in tumor cells,  
11 was discovered from a human milk protein (37). Alpha1H (the alpha1 domain of α-  
12 lactalbumin in complex with oleic acid), which was further developed from HAMLET, has  
13 entered the First-in-Human trial in patients with bladder cancer (clinicaltrials.gov identifier  
14 NCT03560479) (38). Third, ACP has never been explored from human milk. Fourth, recent  
15 advances in mass spectrometric-based proteomics allow high-throughput peptide  
16 identification from human milk, and *in silico* ACP prediction algorithms based on the peptide  
17 amino acid sequences have been progressed during the last several years.

18 Therefore, this study developed an integrative workflow for ACP discovery by  
19 combining the strengths of mass spectrometry, *in silico* screening, and experimental  
20 validation. This strategy replaces labor-intensive and time-consuming processes of the  
21 activity-guided purification by applying mass spectrometric peptide identification of the  
22 fractionated human milk samples, and the results were compiled into the peptide library of  
23 natural occurring-human milk peptides. Peptide amino acid sequences were subsequently fed  
24 into *in silico* screening to shorten the time-to-discovery and lessen the cost burden of the  
25 large-scale experiment. Finally, the prioritized peptide candidates could be validated for anti-  
26 leukemic activities by *in vitro* cellular studies.

27 To prioritize the peptides for experimental screening and validation, we hypothesized  
28 that the consensus results from the physicochemical property (positive charge), secondary  
29 peptide structure (alpha-helix), and ACP predictive results from different machine learning  
30 models would provide the best chance of ACP identification from the given peptide library.  
31 This hypothesis was grounded on previous evidence that; i) the net positively charged  
32 peptides are attractive to the net negatively charged cancer cell membranes (39); ii) most  
33 known oncolytic peptides share alpha-helical structure (32); iii) different machine learning  
34 models were trained and tested upon various data sets of known ACPs (33-36), thereby these  
35 models could have varied predictive performance against the new unknown peptide data set.  
36 More votes would provide more confidence in the predictive results. Since it was unknown  
37 at the initial stage of this study if this integrative approach would be successful, we, therefore,  
38 explored each of the preferred ACP properties. For this reason, eight selected peptide  
39 candidates were identified and screened for anti-leukemic effect (**Figure 3** and **Table S3**).  
40 BMP-S6, the positive control of the experimental validation, has met all three criteria and  
41 showed the anti-leukemic effect with a trade-off of more toxicity toward normal cells. Six  
42 out of eight selected peptide candidates were not met all three criteria and showed no activity  
43 *in vitro*. HMP-S7 and HMP-S8 were the top 2 candidates that met all three criteria of the

integrative workflow; nonetheless, only HMP-S7 had the cytotoxic effect against leukemic cells. From this observation, we learned that this integrative approach is more accurate than using a single preferred anticancer property to prioritize peptide candidates. When one peptide candidate met all three criteria, the difference in one positive charge (and perhaps two votes from machine learning models) did matter for the anti-leukemic prediction (**Figure 3**). In future studies, this integrative approach of ACP screening can be applied to larger data sets, either the mass spectrometric-based or the *in silico* generated peptide libraries, to speed up the discovery of ACP against multiple cancer types.

Looking forward, HMP-S7 should be further validated in preclinical models. Further peptide modifications using HMP-S7 as a prototype, for example, amino acid substitution (40), homing motif tagging (41), and PEGylation (42), may improve its anticancer efficacy, tumor targeting, and biocompatibility and stability. Furthermore, the human milk peptide library can be expanded by further profiling relevant biospecimens or by *in silico* peptide generation from the proteins of interest. Aforementioned *in vitro* study support, machine learning for ACP prediction might be further improved by a combination of ensemble models, physicochemical property, and secondary peptide structure.

This study had limitations. It was expected that milk peptides should present a more significant number of unique identities than those identified in this study. Losing of peptides during mass spectrometric detection because of their neutral net charge may be one reason. Another possibility is that the milk peptides may be degraded during the fractionation process. These limitations could be overcome by the combined methods using fractionations and high-resolution mass spectrometry detection. The issues related to the small peptide library because of experimental bottlenecks could be addressed by *in silico* generated peptide database as aforementioned, given that the custom-made peptides are commercially available and ready for anticancer activity screening. Lastly, it should be emphasized that *ex vivo* experiments of HMP-S7 by using the patient's derived leukemic cells should be further explored in the future.

## Conclusions

This study discovered HMP-S7 (SFIPRAKSTWLNNIKLL) as the novel anti-leukemic peptide derived from human breast milk. This anti-leukemic peptide is a cationic and alpha-helical structure peptide that selectively kills leukemic cells but not normal cells. Future research on peptide modification, together with the efficacy studies in preclinical animal models or patient's derived leukemic cells *ex vivo*, is warranted to develop HMP-S7 as peptide-based cancer therapeutics in the future.

## Materials and Methods

**Human milk collection.** Human milk (60 ml) from 10 healthy volunteer mothers of full-term infant, whose blood test has no infection of HIV, Hepatitis B or C viruses, and Syphilis, were collected by a breast pump and stored in a freezer (-20°C) as per the regulation of Ramathibodi Human Milk Bank (RHMB) before transferring to the laboratory (43). All subjects gave their informed consent for inclusion before they participated in the study. The study was conducted in accordance with the Declaration of Helsinki, and the protocol was approved by the Human Research Ethics Committee, Faculty of Medicine Ramathibodi Hospital, Mahidol University (Protocol ID-11-60-13).

**Peptide isolation and fractionation.** Three pooled milk specimens were produced from 3, 3, and 4 individual specimens (**Table S1**) before further processing. Twenty milliliters of pooled milk specimens were centrifuged at 4°C, 1,500 g for 10 min, and then 5,000 g for 30 min twice to remove cells and lipids. The collected supernatant was centrifuged at 4°C,

12,000 g for 1 h, 32,000 g for 1 h, and finally, 200,000 g for 1 h to remove extracellular vesicles, including microvesicles and exosomes. Thereafter, peptides (<3 kDa) were separated from high molecular size proteins by a 3 kDa cutoff ultrafiltration column (Amicon<sup>®</sup>, Merck Millipore Ltd., Cork, Ireland). The crude peptides (<3 kDa) in the flow-through fraction were injected into the C18 solid-phase extraction (SPE) column (Waters, Waters Corporation, Massachusetts, USA). The bound peptides were then step-wise eluted by 1 mL each of 15%, 20%, 25%, 30%, 35%, 40%, 45%, 50%, 55%, and 80% acetonitrile (ACN), respectively. The eluate peptides were dried by SpeedVac concentrator (Labconco, Labconco Corporation, Missouri, USA). The dried peptides were resuspended in deionized (dI) water for peptide estimation using Bradford's assay (Bio-rad) (44).

**Synthetic peptides.** Nine synthetic peptides (>90% purity) (**Table S3**) were custom ordered from GL Biochem (GL Biochem (Shanghai) Ltd., Shanghai, China) and resuspended in the appropriate culture medium to the final concentration of 200  $\mu$ M before used.

**Cell culture.** Cell lines were obtained from the American Type Culture Collection (ATCC). Jurkat (ATCC<sup>®</sup> TIB-152<sup>™</sup>), RS4;11 (ATCC<sup>®</sup> CRL-1873<sup>™</sup>) and Raji (ATCC<sup>®</sup> CCL-86<sup>™</sup>) cells were maintained in RPMI-1640 medium (Gibco, Thermo Fisher Scientific, MA, USA) supplemented with 10% fetal bovine serum (FBS) (Gibco) and 1 $\times$  penicillin/streptomycin (Gibco) in 5% CO<sub>2</sub> at 37°C, while Sup-B15 (ATCC<sup>®</sup> CRL-1929<sup>™</sup>) cells were cultured in Iscove's modified Dulbecco's medium (IMDM) supplemented with 0.05 mM 2-mercaptoethanol (Sigma) and 20% FBS (Gibco) and 1 $\times$  penicillin/streptomycin (Gibco). SH-SY5Y (ATCC<sup>®</sup> CRL-2266<sup>™</sup>), MDA-MB-231 (ATCC<sup>®</sup> HTB-26<sup>™</sup>), A549 (ATCC<sup>®</sup> CCL-185<sup>™</sup>) cell lines were grown in Dulbecco's Modified Eagle's Medium (DMEM)-high glucose (Gibco) supplemented with 10% FBS and 1 $\times$  penicillin/streptomycin in 5% CO<sub>2</sub> at 37°C. HT-29 cells (ATCC<sup>®</sup> HTB-38<sup>™</sup>) and HepG2 (ATCC<sup>®</sup> HB-8065<sup>™</sup>) were grown in DMEM-F12 (Gibco) supplemented with 10% FBS and 1 $\times$  penicillin/streptomycin in 5% CO<sub>2</sub> at 37°C.

For representative normal cells, FHs74Int (ATCC<sup>®</sup> CCL-241<sup>™</sup>) fetal intestinal epithelial cells were cultured in Hybri-Care Medium (ATCC<sup>®</sup> 46-X<sup>™</sup>) supplemented with 30 ng/ml epidermal growth factor (EGF), 10% FBS (Gibco) and 1 $\times$  penicillin/streptomycin (Gibco) in 5% CO<sub>2</sub> at 37°C. HEK293T human embryonic kidney cells (ATCC<sup>®</sup> CRL-3216<sup>™</sup>) were maintained in DMEM-high glucose (Gibco) supplemented with 10% FBS and 1 $\times$  penicillin/streptomycin in 5% CO<sub>2</sub> at 37°C. Human peripheral blood mononuclear cells (PBMCs) were prepared from 10 mL EDTA blood for T cell cultivation. The whole blood was diluted in PBS at a ratio of 1:1, and then carefully layer the diluted blood into Ficoll-Paque solution (Robbins Scientific Cooperation, Norway) with a ratio of 2:1 (diluted blood:Ficoll-Paque solution). The tube containing layer solution was centrifuged at 400 g, 20°C for 35 min with no break. One million PBMCs were cultured in the OKT3 and CD28 coated plate. Briefly, 1  $\mu$ g each of OKT3 and CD28 was added into 1 ml PBS in a 24-well plate and incubated at room temperature for 2 h. The coated well was washed with PBS once before adding PBMCs. The PBMCs in coated well were cultured in RPMI-1640 supplemented with 100U/mL IL-2, 10% FBS and 1 $\times$  penicillin/streptomycin in the presence of OKT3 and CD28 for 3 days at 37°C under a humidified atmosphere with 5% CO<sub>2</sub> before used.

**Human milk peptide identification by mass spectrometry.** Dried human milk peptides (2  $\mu$ g) were resuspended in 0.1% formic acid and centrifuged at 14,000 rpm for 30 min. The supernatant was collected and injected into the C18 column (75  $\mu$ m i.d.  $\times$  100 mm) by using Easy-nLC (Thermo Fisher Scientific, Inc.) to desalt and concentrate. The peptides were

44 separated with a gradient of 5-45% acetonitrile/0.1% formic acid for 30 min at a flow rate  
45 of 300 nl/min. The isolated peptides were identified by the amaZon speed ETD ion trap  
46 mass spectrometer (Bruker Daltonics, Billerica, MA, USA). Peptide sequences and  
47 identification were interpreted using in-house MASCOT software version 2.4.0 with the  
48 SwissProt database, against *Homo sapiens*, no fixed and no variable modifications, no  
49 enzymatic digestion with no missed cleavage allowed, monoisotopic,  $\pm 1.2$  Da for peptide  
50 tolerance,  $\pm 0.6$  Da for fragment ion tolerance, 2+ and 3+ charge state for ESI-TRAP  
51 instrument. Identified peptides were provided ion scores higher than 20 (significance  
52 threshold at  $p < 0.05$ ).

53  
54 ***In silico* anticancer peptide screening.** Physicochemical properties of all identified human  
55 milk peptides were predicted by using the PepDraw tool  
56 (<http://www.tulane.edu/~biochem/WW/PepDraw/>), including peptide length, mass, net  
57 charge, isoelectric point (pI), and hydrophobicity. Peptide structures were predicted using  
58 the PEP-FOLD3 De novo peptide structure prediction tool (45-47). Anticancer properties  
59 were predicted by four web-based machine learning programs, including i) ACPred-FL  
60 (Tianjin University, School of Computer Science and Technology, China), a sequence base  
61 predictor for identifying anti-cancer peptides from proteins, by using classification mode at  
62 confidence 0.5 as default setting (<http://server.malab.cn/ACPred-FL/#>) (33); ii) AntiCP 2.0,  
63 an ensemble tree classifier on amino acid composition  
64 (<https://webs.iitd.edu.in/raghava/anticp2/index.html>) (34); iii) MLACP, a random forest-  
65 based prediction of anticancer peptides ([www.thegleelab.org/MLACP.html](http://www.thegleelab.org/MLACP.html)) (35); and iv)  
66 mACPpred, a Support Vector Machine-Based Meta-Predictor ([http://www.thegleelab.org/](http://www.thegleelab.org/mACPpred)  
67 mACPpred) (36).  
68

69 **Cytotoxicity assay.** For cell treatment, the fractionated milk peptides (10  $\mu\text{g}$ /reaction) or  
70 the synthetic peptides (varied concentrations as indicated) were resuspended in 100  $\mu\text{L}$  of  
71 culture media with appropriated supplements. For floating cells, the peptide solution was  
72 mixed with cell suspension (10,000 cells/10  $\mu\text{L}$ /well) in a well of 96-well plate flat bottom.  
73 For adherent cells, 10,000 cells were seeded into a 96-well plate (flat bottom) and cultured  
74 until they reached 80% confluence before adding 100  $\mu\text{L}$  of peptide solution into the well  
75 containing 80% FHs 74 Int cell confluence (3 technical replication). The peptide-treated  
76 cells were incubated for 24, 48, or 72 h in 5%  $\text{CO}_2$  incubator at 37°C with humidity as  
77 indicated. Cell viability was measured by trypan blue exclusion or WST-1 assays (Roche  
78 Diagnostics GmbH, Mannheim, Germany).

79 The two synthetic peptides at 200  $\mu\text{M}$  final concentration, i.e., HMP-S7 and BMP-  
80 S6 were selected to treat with normal (T cells and HEK293T (human embryonic kidney  
81 cells)) and cancer cell lines (SH-SY5Y (neuroblastoma), MDA-MB-231 (breast  
82 adenocarcinoma), HT29 (colorectal adenocarcinoma), A549 (lung carcinoma), HepG2  
83 (hepatocellular carcinoma)).

84 Human peripheral blood mononuclear cells (PBMCs) were prepared from 10 mL  
85 EDTA peripheral blood collection as aforementioned for T cell culture. The protocol was  
86 approved by the Human Research Ethics Committee, Faculty of Medicine Ramathibodi  
87 Hospital, Mahidol University, based on the Declaration of Helsinki (Protocol ID-06-61-09).  
88 The  $1 \times 10^4$  floating cells (in 10  $\mu\text{L}$ ), i.e., T cells, were added to 96-well plate, flat bottom  
89 containing 100  $\mu\text{L}$  of their culturing medium with or without 200  $\mu\text{M}$  HMP-S7 and 200  $\mu\text{M}$   
90 BMP-S6. While,  $1 \times 10^4$  adherent cells were seed in 96-well plate, flat bottom and then  
91 cultured 1-2 overnight at 37°C under a humidified atmosphere with 5%  $\text{CO}_2$  incubator until  
92 90-100% cell confluent. The cultured medium was removed, and then added the medium  
93 containing 200  $\mu\text{M}$  HMP-S7 and 200  $\mu\text{M}$  BMP-S6. All treated and untreated cells were

94 incubated for 24 h before trypsinization (for adherent cells) and split to cell death  
95 measurement using trypan blue exclusion assay (3 technical replications).  
96

97 **Half maximum inhibitory concentration (IC<sub>50</sub>) by trypan blue assay.** Four distinct  
98 leukemic cell lines, i.e., Jurkat, Raji, RS4;11, and Sup-B15 cell lines were cultured in the  
99 medium containing HMP-S7 in vary concentrations (0, 6.25, 12.5, 25, 50, 100, 200, and 400  
00  $\mu$ M) in 96-well plate, flat bottom for 24 h ( $1 \times 10^4$  cells/100  $\mu$ L/well). The %cell death was  
01 estimated by trypan blue exclusion assay using (cell death number/total cell number)  $\times$  100.  
02 IC<sub>50</sub> calculation used linear ( $y=ax+c$ ) or parabolic ( $y=ax^2+bx+c$ ) equation for  $y=50$  value  
03 and  $x$  value= IC<sub>50</sub> concentration. IC<sub>50</sub> concentration of HMP-S7 to the 4 leukemic cell lines  
04 was reported in mean $\pm$ SD.  
05

06 **Soft agar assay for colony formation.** Base agar (1.5 mL of 0.5% agar containing  $1 \times$ RPMI  
07 supplement with 10% FBS and  $1 \times$  penicillin/streptomycin) were plated on each well of a 6-  
08 well plate and set aside for 5 min to allow the agar to solidify. Jurkat cells were treated with  
09 100  $\mu$ M, 200  $\mu$ M, 400  $\mu$ M HMP-S7, and 200  $\mu$ M BMP-S6 in a 96-well plate (3 technical  
10 replications, 100  $\mu$ L/10,000 cells/well) for 24 h. After 24 h, the treated/untreated cells in the  
11 96-well plate were thoroughly mixed and equally taken (20  $\mu$ L) to mix in 1 mL of the top  
12 agar solution (0.3% agarose containing  $1 \times$ RPMI supplement with 10% FBS and  $1 \times$   
13 penicillin/streptomycin). The cell suspension was plated on top of the base agar (3 biological  
14 replication) and then allowed agarose to form solid. The medium (0.5 mL) was added on  
15 top of the agar to prevent agar dry. The plate was incubated at 37°C in a humidified  
16 incubator for 20 days with feed the medium twice a week. The agar was stained with 1 mL  
17 of 0.005% crystal violet in 20% ethanol for 1 h, destained with 20% ethanol overnight, and  
18 then counted the colonies under stereomicroscope SZ61 (Olympus Corporation, Tokyo,  
19 Japan).  
20

21 **Apoptosis assay.** Four leukemic cell lines ( $1 \times 10^5$  cells/500  $\mu$ L/well/cell type) were cultured  
22 in 24 well-plate in the medium containing HMP-S7 with IC<sub>50</sub> and  $2 \times$ IC<sub>50</sub> concentrations and  
23 non-treatment condition for 24 h (biological triplication). The untreated cells were divided  
24 into 3 tubes that are unstained, cells stained with FITC tagged annexin V (no propidium  
25 iodide (PI)), and cells stained with PI (no FITC tagged annexin V) to set up compensation  
26 and quadrants. The untreated and treated cells were collected and wash cells with cold PBS  
27 twice. Thereafter, the cells were resuspended with 100  $\mu$ L of  $1 \times$  binding buffer and then  
28 added 5  $\mu$ L of FITC tagged annexin V and 5  $\mu$ L of PI. The cell suspensions were gently  
29 mixed and incubated at room temperature for 15 min in dark. Then, 400  $\mu$ L of  $1 \times$  binding  
30 buffer was added to each tube, and then the cells were analyzed by using flow cytometry.  
31

32 **Lactate dehydrogenase (LDH) release assay.** RS4;11 leukemic cell lines ( $2 \times 10^5$  cells/1  
33 mL/well/cell type) were cultured in 24 well-plate in the complete medium containing HMP-  
34 S7 at IC<sub>50</sub> and  $2 \times$ IC<sub>50</sub> concentrations, without HMP-S7 condition (non-treatment), and 0.5%  
35 Triton X-100 for 24 h incubation (biological triplication). The cell suspension was collected  
36 and centrifuged at 200 g for 5 min at room temperature. The 1 mL of supernatant was  
37 collected and measured LDH isoenzyme by measuring lactate to pyruvate and NADH,  
38 which increased absorbance at 340 nm using Abbott Architect C16000 clinical chemistry  
39 analyzer (Holliston, MA, USA) at Clinical Chemistry Unit of Department of Pathology at  
40 Ramathibodi Hospital, Thailand. LDH level (U/L) of the culture media was subtracted from  
41 the background of the fresh medium and reported as mean $\pm$ SD.  
42

**FITC tagged HMP-S7 internalized into leukemic cells.** The  $2 \times 10^4$  Jurkat cells/100  $\mu$ l/well in the 96-well plate was treated with HMP-S7 tagged with/without FITC at  $IC_{50}$  for 24 h. Thereafter, the treated and untreated Jurkat cells were washed with  $1 \times$  PBS once before staining with propidium iodide (PI) cell stain kit (Invitrogen) and Hoechst 33342 (Cell Signaling Technology, Inc, Massachusetts, USA), for 30 min at room temperature in dark. After incubation, the cells were centrifuged at 200 g for 5 min and removed the excess dye solution before washing with  $1 \times$  PBS twice. The cell pellet was mixed with 20% glycerol/PBS and mounted on a glass slide for confocal microscopy (Nikon Instruments, Inc, NY, USA).

**Statistical Analysis.** The number and percentage of death or live cells, OD and  $IC_{50}$ , were calculated and statistical testing using Student's *t-test* as statistical significance at  $p < 0.05$ .

## Acknowledgments

**General:** We would like to thank Mrs. Sirimon Kongthaworn, for assisting milk collection at RHMB, and staff at the Laboratory of Biochemistry, Chulabhorn Research Institute, and at Pediatric Department and Research Center at Faculty of Medicine Ramathibodi Hospital for supporting research instrument facility.

**Funding:** This study was supported by BRAND'S Health Research Award 2017 (Cerebos Award 2017 to W.C.), Children Cancer Fund under the Patronage of HRH Princess Soamsawali and Ramathibodi Foundation (to S.H.), and the New Discovery and Frontier Research Grant of Mahidol University (NDFR19/2563 to SC). SC was financially supported by the Faculty Staff Development Program of Faculty of Medicine Ramathibodi Hospital, Mahidol University, for his research activities.

**Author contributions:** Conceptualization, S.C.; methodology, W.C., S.C.; formal analysis, W.C., J.P., T.V., N.P., T.L., C.S., S.C.; resources, P.N., S.S., J.S., S.H., S.C.; writing – original draft preparation, W.C., writing – review and editing, J.P., T.V., N.P., T.L., P.N., S.S., C.S., J.S., S.H., S.C.; visualization, W.C., S.C.; supervision, J.S., S.H. All authors have read and agreed to the published version of the manuscript.

**Competing interests:** All authors declared no conflicts of interest.

**Data and materials availability:** The dataset used or analyzed during this study is included in this published article and its supplementary information files.

## References

1. L. A. Torre, R. L. Siegel, E. M. Ward, A. Jemal, Global Cancer Incidence and Mortality Rates and Trends--An Update. *Cancer Epidemiol Biomarkers Prev* **25**, 16-27 (2016).
2. R. L. Siegel, K. D. Miller, A. Jemal, Cancer statistics, 2016. *CA Cancer J Clin* **66**, 7-30 (2016).
3. H. M. Kantarjian, M. J. Keating, E. J. Freireich, Toward the potential cure of leukemias in the next decade. *Cancer* **124**, 4301-4313 (2018).
4. L. L. Robison, S. Bhatia, Late-effects among survivors of leukaemia and lymphoma during childhood and adolescence. *Br J Haematol* **122**, 345-359 (2003).
5. D. A. Mulrooney, G. Hyun, K. K. Ness, N. Bhakta, C. H. Pui, M. J. Ehrhardt, K. R. Krull, D. B. Crom, W. Chemaitilly, D. K. Srivastava, M. V. Relling, S. Jeha, D. M. Green, Y. Yasui, L. L. Robison, M. M. Hudson, The changing burden of long-term health outcomes in survivors of childhood acute lymphoblastic leukaemia: a retrospective analysis of the St Jude Lifetime Cohort Study. *Lancet Haematol* **6**, e306-e316 (2019).
6. D. Bhojwani, S. C. Howard, C. H. Pui, High-risk childhood acute lymphoblastic leukemia. *Clin Lymphoma Myeloma* **9 Suppl 3**, S222-230 (2009).



- 95 7. F. Harris, S. R. Dennison, J. Singh, D. A. Phoenix, On the selectivity and efficacy of defense peptides  
96 with respect to cancer cells. *Med Res Rev* **33**, 190-234 (2013).
- 97 8. N. Papo, Y. Shai, Host defense peptides as new weapons in cancer treatment. *Cell Mol Life Sci* **62**, 784-  
98 790 (2005).
- 99 9. T. Utsugi, A. J. Schroit, J. Connor, C. D. Bucana, I. J. Fidler, Elevated expression of phosphatidylserine  
00 in the outer membrane leaflet of human tumor cells and recognition by activated human blood  
01 monocytes. *Cancer Res* **51**, 3062-3066 (1991).
- 02 10. K. Kozłowska, J. Nowak, B. Kwiatkowski, M. Cichorek, ESR study of plasmatic membrane of the  
03 transplantable melanoma cells in relation to their biological properties. *Exp Toxicol Pathol* **51**, 89-92  
04 (1999).
- 05 11. M. Sok, M. Sentjurc, M. Schara, Membrane fluidity characteristics of human lung cancer. *Cancer Lett*  
06 **139**, 215-220 (1999).
- 07 12. F. Schweizer, Cationic amphiphilic peptides with cancer-selective toxicity. *Eur J Pharmacol* **625**, 190-  
08 194 (2009).
- 09 13. I. Murota, S. Taguchi, N. Sato, E. Y. Park, Y. Nakamura, K. Sato, Identification of antihyperuricemic  
10 peptides in the proteolytic digest of shark cartilage water extract using in vivo activity-guided  
11 fractionation. *J Agric Food Chem* **62**, 2392-2397 (2014).
- 12 14. X. Chen, L. Zhang, C. Ma, Y. Zhang, X. Xi, L. Wang, M. Zhou, J. F. Burrows, T. Chen, A novel  
13 antimicrobial peptide, Ranatuerin-2PLx, showing therapeutic potential in inhibiting proliferation of  
14 cancer cells. *Biosci Rep* **38**, (2018).
- 15 15. R. Ma, S. W. Wong, L. Ge, C. Shaw, S. W. I. Siu, H. F. Kwok, In Vitro and MD Simulation Study to  
16 Explore Physicochemical Parameters for Antibacterial Peptide to Become Potent Anticancer Peptide.  
17 *Mol Ther Oncolytics* **16**, 7-19 (2020).
- 18 16. A. Pihlanto, H. Korhonen, Bioactive peptides and proteins. *Adv Food Nutr Res* **47**, 175-276 (2003).
- 19 17. D. P. Mohanty, S. Mohapatra, S. Misra, P. S. Sahu, Milk derived bioactive peptides and their impact on  
20 human health - A review. *Saudi J Biol Sci* **23**, 577-583 (2016).
- 21 18. Y. Fu, C. Ji, X. Chen, X. Cui, X. Wang, J. Feng, Y. Li, R. Qin, X. Guo, Investigation into the  
22 antimicrobial action and mechanism of a novel endogenous peptide beta-casein 197 from human milk.  
23 *AMB Express* **7**, 119 (2017).
- 24 19. D. C. Dallas, A. Guerrero, N. Khaldi, P. A. Castillo, W. F. Martin, J. T. Smilowitz, C. L. Bevins, D.  
25 Barile, J. B. German, C. B. Lebrilla, Extensive in vivo human milk peptidomics reveals specific  
26 proteolysis yielding protective antimicrobial peptides. *J Proteome Res* **12**, 2295-2304 (2013).
- 27 20. I. Politis, R. Chronopoulou, Milk peptides and immune response in the neonate. *Adv Exp Med Biol* **606**,  
28 253-269 (2008).
- 29 21. X. Cui, Y. Li, L. Yang, L. You, X. Wang, C. Shi, C. Ji, X. Guo, Peptidome analysis of human milk from  
30 women delivering macrosomic fetuses reveals multiple means of protection for infants. *Oncotarget* **7**,  
31 63514-63525 (2016).
- 32 22. H. Meisel, R. J. FitzGerald, Biofunctional peptides from milk proteins: mineral binding and  
33 cytomodulatory effects. *Curr Pharm Des* **9**, 1289-1295 (2003).
- 34 23. M. Zhao, C. Wei, X. Yang, J. Zhou, J. Wang, F. Gu, T. Lei, Y. Qin, The milk-derived hexapeptide  
35 PGPIPn inhibits the invasion and migration of human ovarian cancer cells by regulating the expression  
36 of MTA1 and NM23H1 genes. *Int J Oncol* **48**, 1721-1729 (2016).
- 37 24. J. Zhou, M. Zhao, Y. Tang, J. Wang, C. Wei, F. Gu, T. Lei, Z. Chen, Y. Qin, The milk-derived fusion  
38 peptide, ACFP, suppresses the growth of primary human ovarian cancer cells by regulating apoptotic  
39 gene expression and signaling pathways. *BMC Cancer* **16**, 246 (2016).
- 40 25. V. B. Smulevich, L. G. Solionova, S. V. Belyakova, Parental occupation and other factors and cancer  
41 risk in children: I. Study methodology and non-occupational factors. *Int J Cancer* **83**, 712-717 (1999).
- 42 26. E. L. Amitay, L. Keinan-Boker, Breastfeeding and Childhood Leukemia Incidence: A Meta-analysis  
43 and Systematic Review. *JAMA Pediatr* **169**, e151025 (2015).
- 44 27. B. K. Kay, M. P. Williamson, M. Sudol, The importance of being proline: the interaction of proline-rich  
45 motifs in signaling proteins with their cognate domains. *FASEB J* **14**, 231-241 (2000).
- 46 28. L. Holfeld, D. Knappe, R. Hoffmann, Proline-rich antimicrobial peptides show a long-lasting post-  
47 antibiotic effect on Enterobacteriaceae and Pseudomonas aeruginosa. *J Antimicrob Chemother* **73**, 933-  
48 941 (2018).

- 49 29. D. Gaspar, A. S. Veiga, M. A. Castanho, From antimicrobial to anticancer peptides. A review. *Front*  
50 *Microbiol* **4**, 294 (2013).
- 51 30. M. R. Felicio, O. N. Silva, S. Goncalves, N. C. Santos, O. L. Franco, Peptides with Dual Antimicrobial  
52 and Anticancer Activities. *Front Chem* **5**, 5 (2017).
- 53 31. M. Mahlapuu, J. Hakansson, L. Ringstad, C. Bjorn, Antimicrobial Peptides: An Emerging Category of  
54 Therapeutic Agents. *Front Cell Infect Microbiol* **6**, 194 (2016).
- 55 32. S. R. Dennison, M. Whittaker, F. Harris, D. A. Phoenix, Anticancer alpha-helical peptides and  
56 structure/function relationships underpinning their interactions with tumour cell membranes. *Curr*  
57 *Protein Pept Sci* **7**, 487-499 (2006).
- 58 33. L. Wei, C. Zhou, H. Chen, J. Song, R. Su, ACPred-FL: a sequence-based predictor using effective  
59 feature representation to improve the prediction of anti-cancer peptides. *Bioinformatics* **34**, 4007-4016  
60 (2018).
- 61 34. P. Agrawal, D. Bhagat, M. Mahalwal, N. Sharma, G. P. S. Raghava, AntiCP 2.0: an updated model for  
62 predicting anticancer peptides. *Brief Bioinform*, (2020).
- 63 35. B. Manavalan, S. Basith, T. H. Shin, S. Choi, M. O. Kim, G. Lee, MLACP: machine-learning-based  
64 prediction of anticancer peptides. *Oncotarget* **8**, 77121-77136 (2017).
- 65 36. V. Boopathi, S. Subramaniyam, A. Malik, G. Lee, B. Manavalan, D. C. Yang, mACPPred: A Support  
66 Vector Machine-Based Meta-Predictor for Identification of Anticancer Peptides. *Int J Mol Sci* **20**,  
67 (2019).
- 68 37. C. Svanborg, H. Agerstam, A. Aronson, R. Bjerkvig, C. Durringer, W. Fischer, L. Gustafsson, O.  
69 Hallgren, I. Leijonhuvud, S. Linse, A. K. Mossberg, H. Nilsson, J. Pettersson, M. Svensson, HAMLET  
70 kills tumor cells by an apoptosis-like mechanism--cellular, molecular, and therapeutic aspects. *Adv*  
71 *Cancer Res* **88**, 1-29 (2003).
- 72 38. T. T. Hien, I. Ambite, D. Butler, M. L. Y. Wan, T. H. Tran, U. Hoglund, M. Babjuk, C. Svanborg,  
73 Bladder cancer therapy without toxicity-A dose-escalation study of alpha1-oleate. *Int J Cancer* **147**,  
74 2479-2492 (2020).
- 75 39. Q. Liu, H. Zhao, Y. Jiang, M. Wu, Y. Tian, D. Wang, Y. Lao, N. Xu, Z. Li, Development of a lytic  
76 peptide derived from BH3-only proteins. *Cell Death Discov* **2**, 16008 (2016).
- 77 40. C. Hu, X. Chen, W. Zhao, Y. Chen, Y. Huang, Design and Modification of Anticancer Peptides. *Drug*  
78 *Des* **5**, 138 (2016).
- 79 41. Z. J. Li, C. H. Cho, Peptides as targeting probes against tumor vasculature for diagnosis and drug  
80 delivery. *J Transl Med* **10 Suppl 1**, S1 (2012).
- 81 42. V. Gupta, S. Bhavanasi, M. Quadir, K. Singh, G. Ghosh, K. Vasamreddy, A. Ghosh, T. J. Siahann, S.  
82 Banerjee, S. K. Banerjee, Protein PEGylation for cancer therapy: bench to bedside. *J Cell Commun*  
83 *Signal* **13**, 319-330 (2019).
- 84 43. P. Kanaprach, N. Pongsakul, N. Apiwattanakul, C. Muanprasat, S. Supapannachart, P. Nuntnarumit, S.  
85 Chutipongtanate, Evaluation of Fetal Intestinal Cell Growth and Antimicrobial Biofunctionalities of  
86 Donor Human Milk After Preparative Processes. *Breastfeed Med* **13**, 215-220 (2018).
- 87 44. S. Chutipongtanate, K. Watcharatanyatip, T. Homvises, K. Jaturongkakul, V. Thongboonkerd,  
88 Systematic comparisons of various spectrophotometric and colorimetric methods to measure  
89 concentrations of protein, peptide and amino acid: detectable limits, linear dynamic ranges,  
90 interferences, practicality and unit costs. *Talanta* **98**, 123-129 (2012).
- 91 45. A. Lamiable, P. Thevenet, J. Rey, M. Vavrusa, P. Derreumaux, P. Tuffery, PEP-FOLD3: faster de novo  
92 structure prediction for linear peptides in solution and in complex. *Nucleic Acids Res* **44**, W449-454  
93 (2016).
- 94 46. Y. Shen, J. Maupetit, P. Derreumaux, P. Tuffery, Improved PEP-FOLD Approach for Peptide and  
95 Miniprotein Structure Prediction. *J Chem Theory Comput* **10**, 4745-4758 (2014).
- 96 47. P. Thevenet, Y. Shen, J. Maupetit, F. Guyon, P. Derreumaux, P. Tuffery, PEP-FOLD: an updated de  
97 novo structure prediction server for both linear and disulfide bonded cyclic peptides. *Nucleic Acids Res*  
98 **40**, W288-293 (2012).
- 99 48. J. S. Mader, A. Richardson, J. Salsman, D. Top, R. de Antueno, R. Duncan, D. W. Hoskin, Bovine  
00 lactoferricin causes apoptosis in Jurkat T-leukemia cells by sequential permeabilization of the cell  
01 membrane and targeting of mitochondria. *Exp Cell Res* **313**, 2634-2650 (2007).
- 02
